# Supplementary material for: A cell-extrinsic ligand acquired by activated T cells in lymph node can bridge L-selectin and P-selectin
Source: PLOS journal article supplement (doi:10.1371/journal.pone.0205685), 2018-10-31
Supplement: S1 (10.1371/journal.pone.0205685.s001) [file journal.pone.0205685.s001]

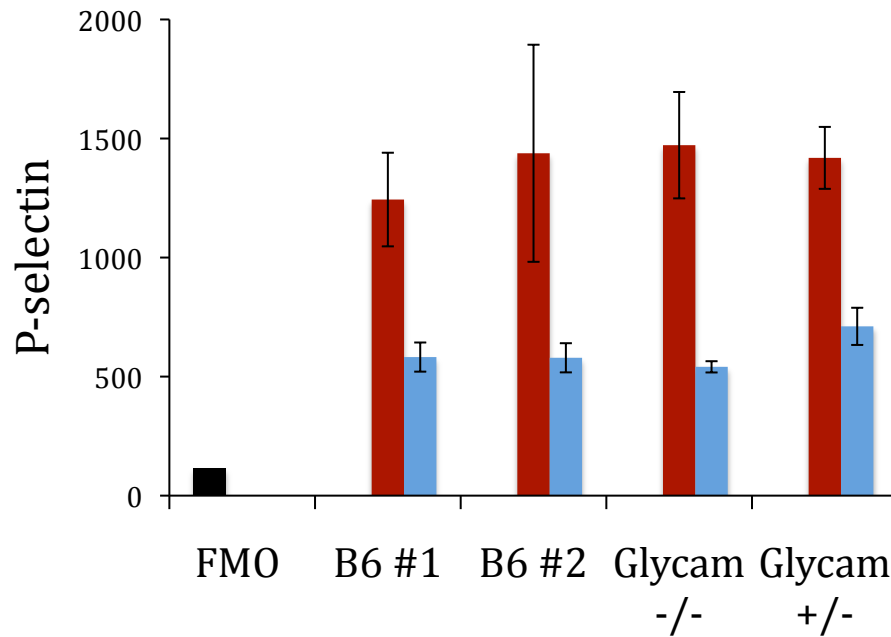

**S1 Fig. Activated CD8<sup>+</sup> T cells responding in *Glycam1*<sup>-/-</sup> recipients load PSL2 normally.** OT1-C2GnT1<sup>-/-</sup> donor cells were activated for three days in two control B6 recipients, a *Glycam1*<sup>-/-</sup> recipient, or a *Glycam1*<sup>+/-</sup> littermate recipient. Peripheral lymph nodes were harvested and either untreated (*red*), or subjected to an EDTA pre-wash to strip PSL2 (*blue*), prior to staining with P-selectin-hIgG followed by anti-hIgG-PE and anti-CD8-APC. Fluorescence-minus-one (FMO) control (*black*) staining of a B6 sample where only P-selectin-hIgG was omitted. Gated analysis of CD8<sup>+</sup>, PI<sup>negative</sup>, singlets shown. Figure shown is representative of three independent analyses. Error bars correspond to one standard deviation of triplicate stains of each sample.
